# Supplementary material for: Effective corrosion inhibition of mild steel in hydrochloric acid by newly synthesized Schiff base nano Co(ii) and Cr(iii) complexes: spectral, thermal, electrochemical and DFT (FMO, NBO) studies
Source: Royal Society of Chemistry journal article supplement (doi:10.1039/d2ra06571a), 2022-01-01
Supplement: d2ra06571a1.pdf [file d2ra06571a1.pdf]

## Supporting Information for

### Effective Corrosion Inhibition of Mild Steel in Hydrochloric Acid by a Newly Synthesized Schiff Base Nano Co(II) and Cr(III) Complexes: Spectral, Thermal, Electrochemical and DFT (FMO, NBO) Studies

Saad Melhi<sup>1</sup>, Mahmoud A. Bedair<sup>2,3,\*</sup>, Eid H. Alosaimi<sup>1</sup>, Ayman A.O. younes<sup>1</sup>, Walaa H. El-Shwiniy<sup>1,4</sup>, Ahmed M. Abuelela<sup>3</sup>

<sup>1</sup>Department of Chemistry, College of science, University of Bisha, P.O. Box 511, Bisha 61922, Saudi Arabia

<sup>2</sup>College of science and arts, University of Bisha, Al-Namas 61977, P.O. Box 101, Saudi Arabia

<sup>3</sup>Department of Chemistry, Faculty of Science (Men's Campus), Al-Azhar University, Nasr City 11884, Cairo, Egypt

<sup>4</sup>Department of Chemistry, Faculty of Science, Zagazig University, Zagazig 44519, Egypt.

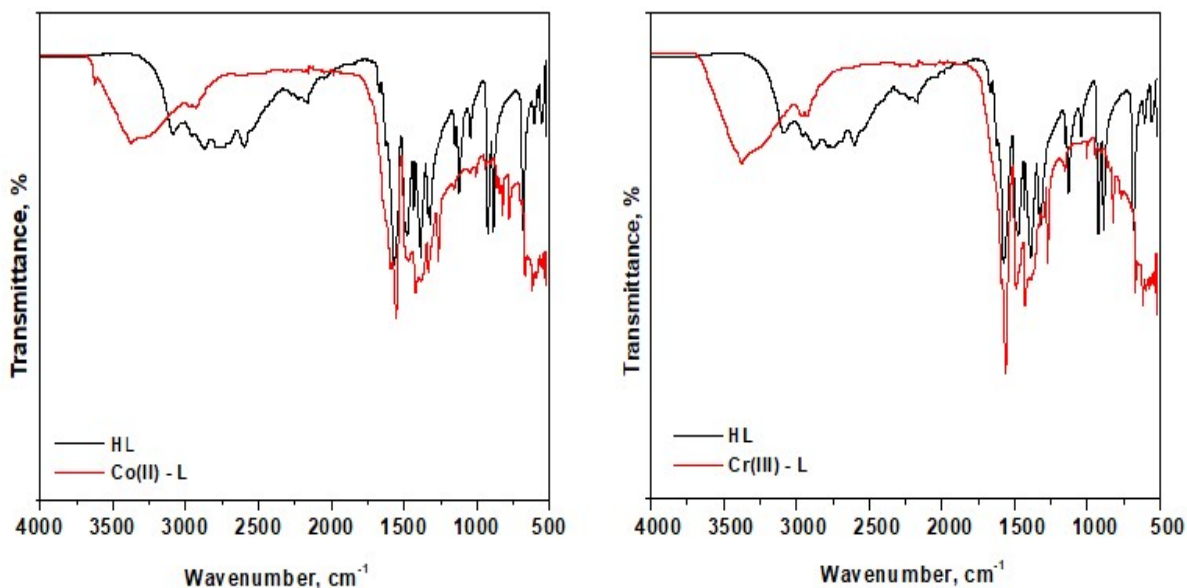

**Fig. S1:** Infrared spectra for **HL** ligand and its complexes.

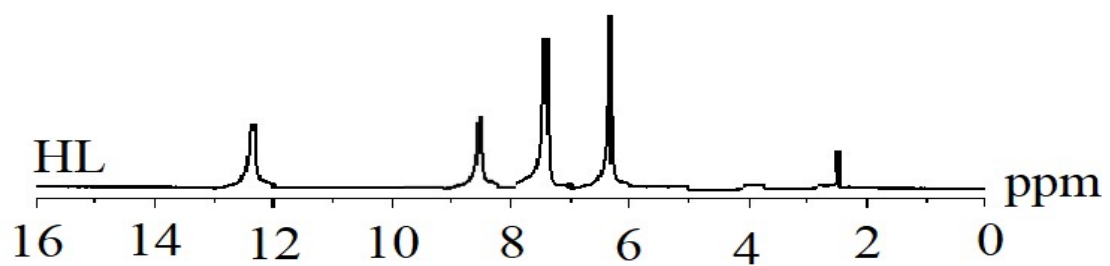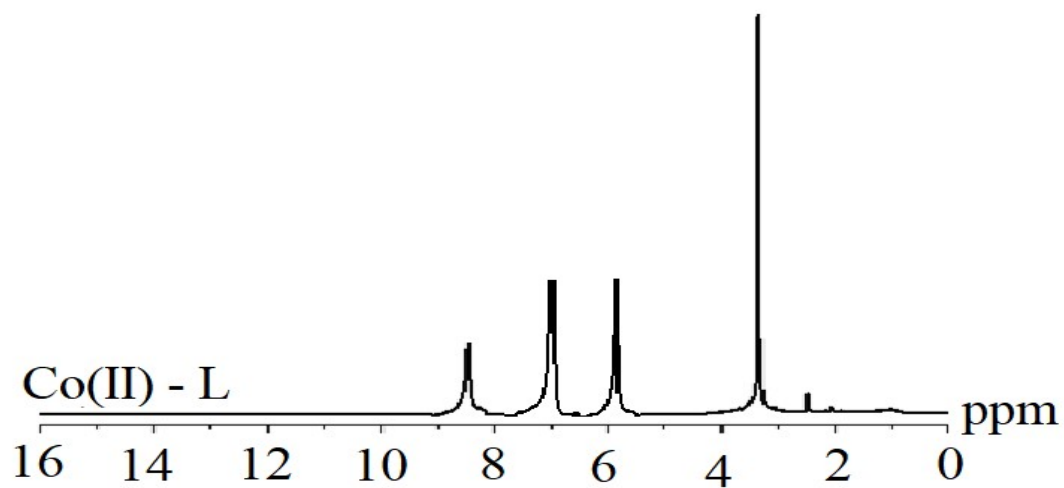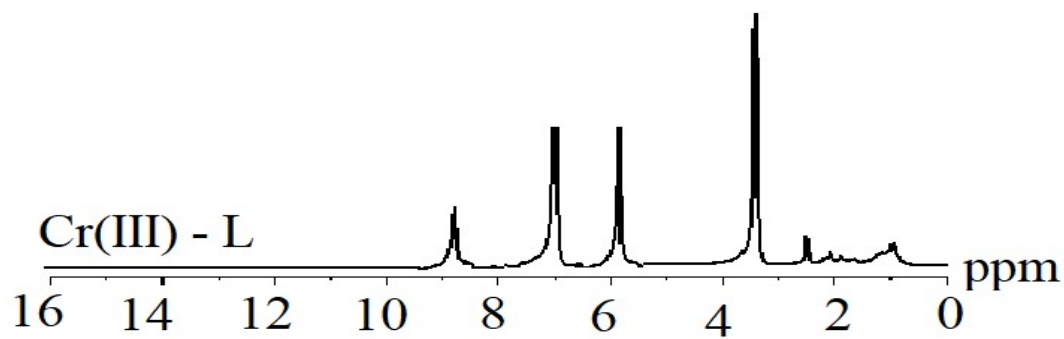

**Fig. S2:** <sup>1</sup>H NMR spectrum for HL and its complexes.

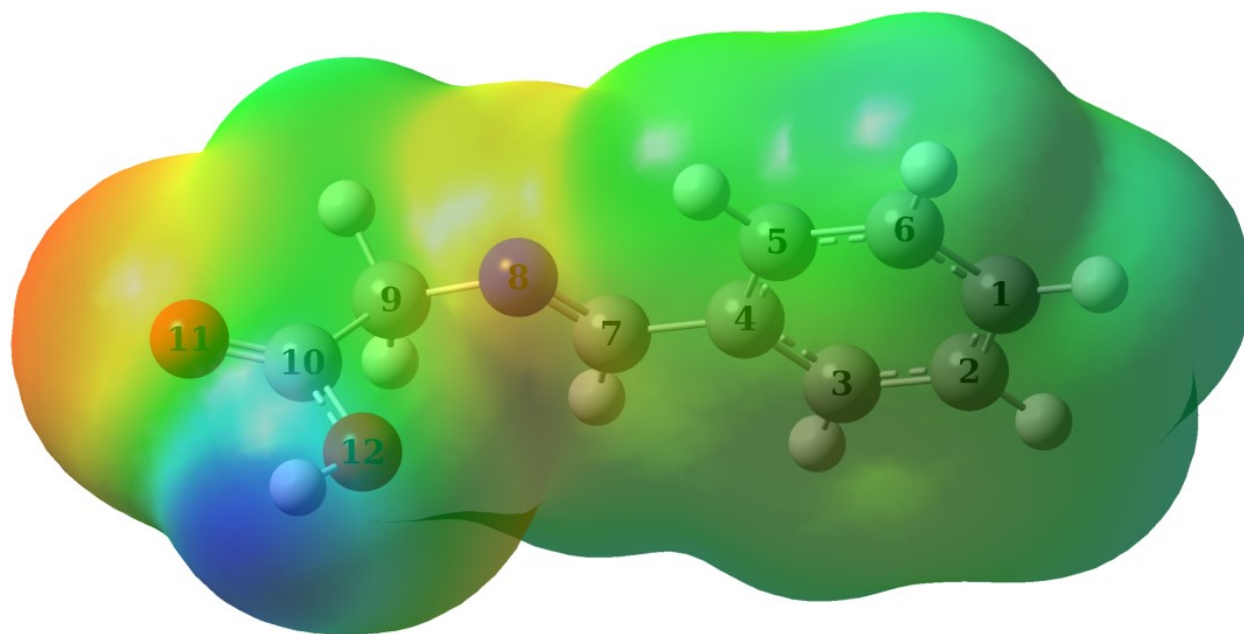

**Fig. S3** Molecular electrostatic potential map of **HL** ligand.

**Table S1** NBOs at inhibitor-metal interactions ordered according to their energies (highest to lowest).

| Type*                                 | Occupancy | Energy   | NBO                 | s %<br>(Atom 1) | p %<br>(Atom 1) | s %<br>(Atom 2) | p %<br>(Atom 2) |
|---------------------------------------|-----------|----------|---------------------|-----------------|-----------------|-----------------|-----------------|
| BD(2)C <sub>5</sub> -C <sub>6</sub>   | 1.66370   | -0.24638 | 0.6968 p + 0.7172 p | 0.00            | 99.95           | 0.00            | 99.96           |
| BD(2)C <sub>3</sub> -C <sub>4</sub>   | 1.63715   | -0.24699 | 0.6961 p + 0.7180 p | 0.00            | 99.96           | 0.00            | 99.98           |
| BD(2)C <sub>1</sub> -C <sub>2</sub>   | 1.65809   | -0.24871 | 0.7018 p + 0.7124 p | 0.00            | 99.96           | 0.00            | 99.96           |
| LP(2)(O <sub>11</sub> )               | 1.97575   | -0.26031 | p <sup>1.00</sup>   | 0.01            | 99.73           | -               | -               |
| BD(2)C <sub>7</sub> -C <sub>8</sub>   | 1.93923   | -0.32113 | 0.6460 p + 0.7633 p | 0.01            | 99.89           | 0.02            | 99.72           |
| LP(2)(O <sub>12</sub> )               | 1.97654   | -0.33105 | p <sup>1.00</sup>   | 00.00           | 99.88           | -               | -               |
| LP(1)(N <sub>8</sub> )                | 1.91109   | -0.35146 | sp <sup>2.30</sup>  | 30.30           | 69.57           | -               | -               |
| BD(2)C <sub>10</sub> -C <sub>11</sub> | 1.99249   | -0.39203 | 0.5543 p + 0.8323 p | 0.40            | 99.40           | 0.60            | 99.05           |

\*LP(1): refers to first lone pair, LP(2): second lone pair, etc. BD(1): bonding orbital of a single bond, BD(2): for double bond.

**Table S2** Calculated NBOs densities of Co(II)-L at expected inhibitor-metal interactions.

|                                                                                                                                                                  |                                                                                                                                                                   |
|------------------------------------------------------------------------------------------------------------------------------------------------------------------|-------------------------------------------------------------------------------------------------------------------------------------------------------------------|
| <p style="text-align: center;"><b>LP(1)C<sub>37</sub></b></p> 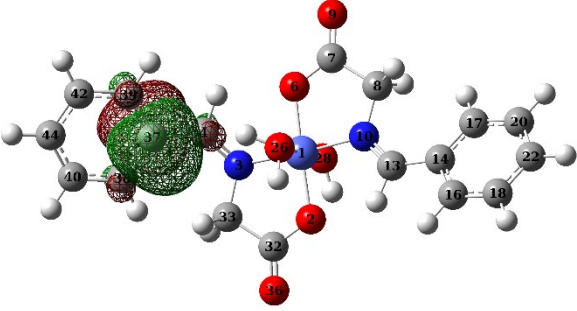                  | <p style="text-align: center;"><b>LP(1)C<sub>44</sub></b></p>                   |
| <p style="text-align: center;"><b>LP(2)O<sub>9</sub></b></p>                   | <p style="text-align: center;"><b>LP(2)O<sub>36</sub></b></p>                  |
| <p style="text-align: center;"><b>BD(2)C<sub>38</sub>-C<sub>40</sub></b></p>  | <p style="text-align: center;"><b>BD(2)C<sub>39</sub>-C<sub>42</sub></b></p>  |
| <p style="text-align: center;"><b>BD(2)C<sub>4</sub>-C<sub>37</sub></b></p>   | <p style="text-align: center;"><b>LP(2)O<sub>6</sub></b></p>                  |
| <p style="text-align: center;"><b>BD(2)C<sub>18</sub>-C<sub>22</sub></b></p>  | <p style="text-align: center;"><b>BD(2)C<sub>14</sub>-C<sub>16</sub></b></p>  |

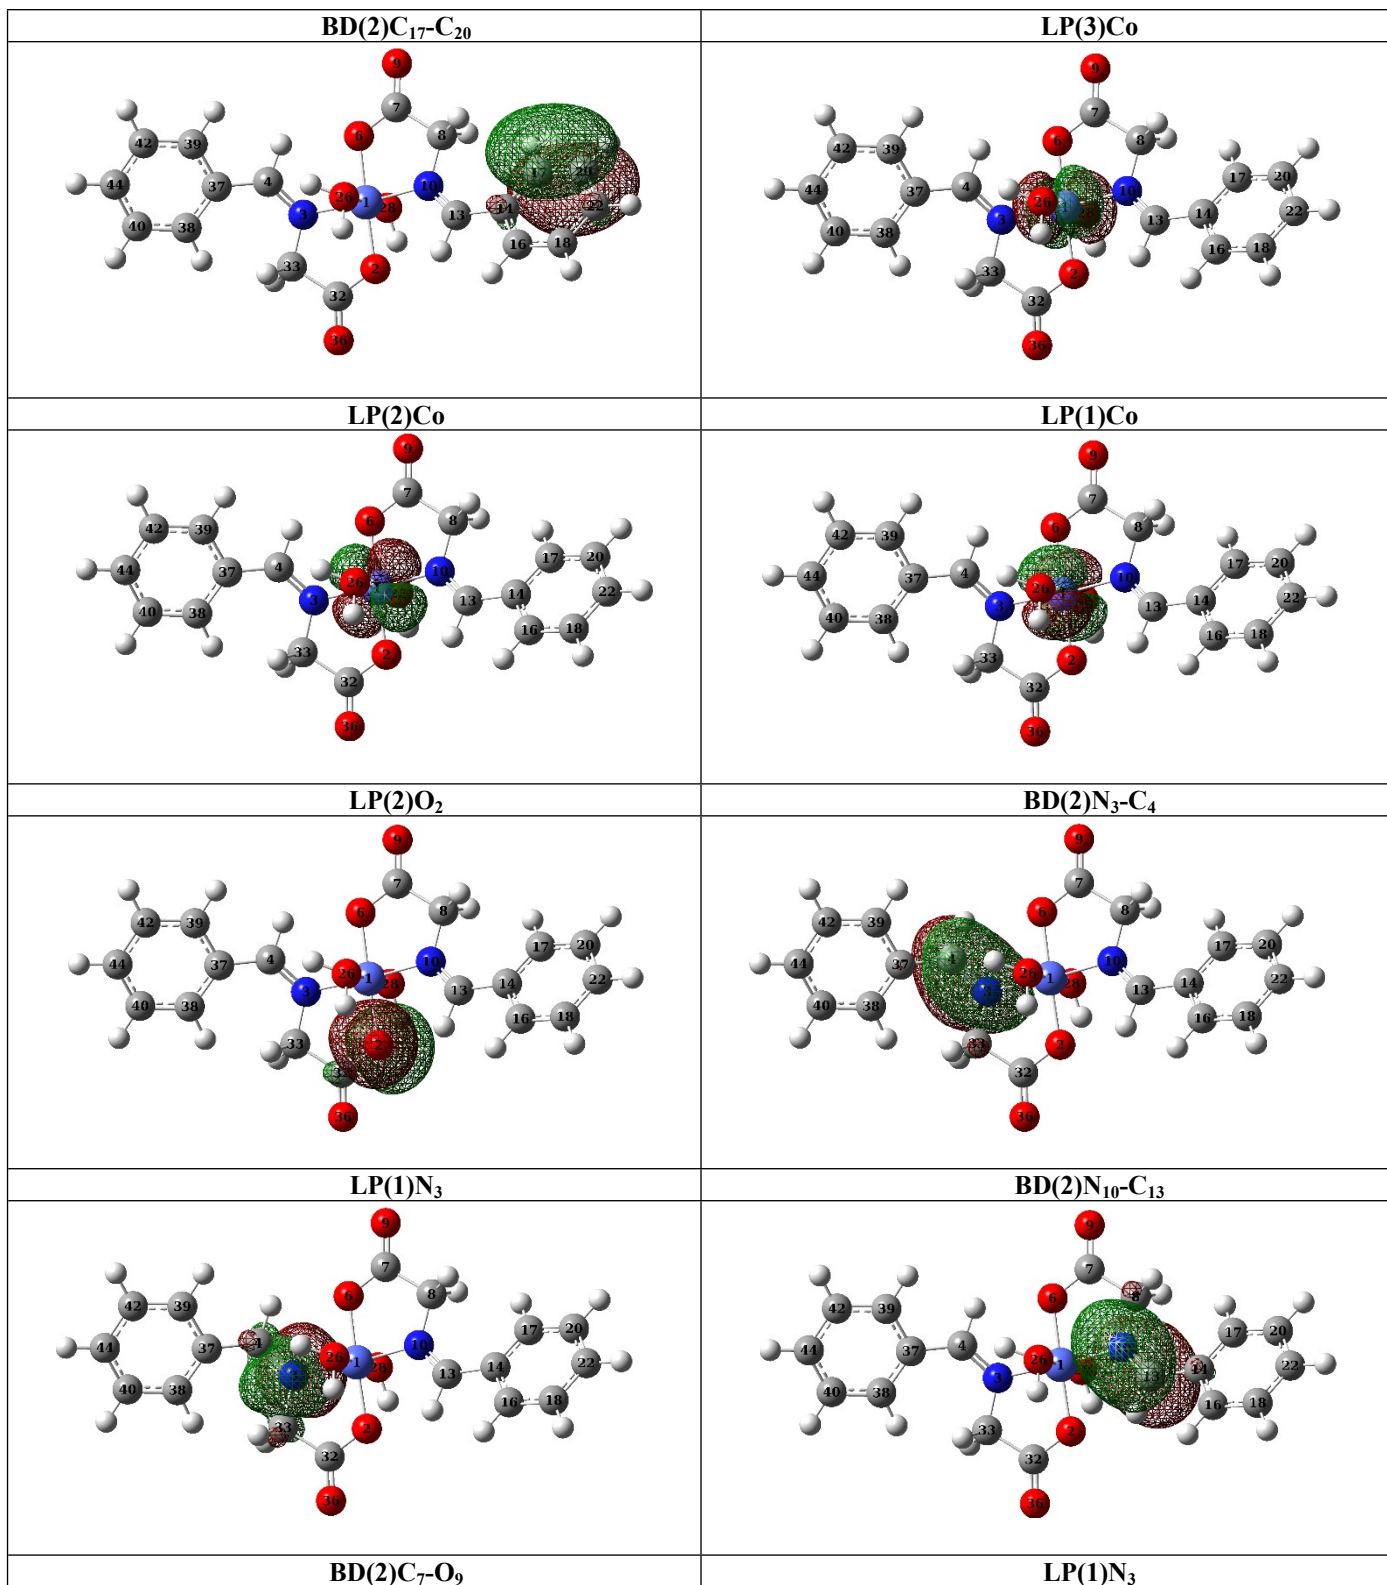

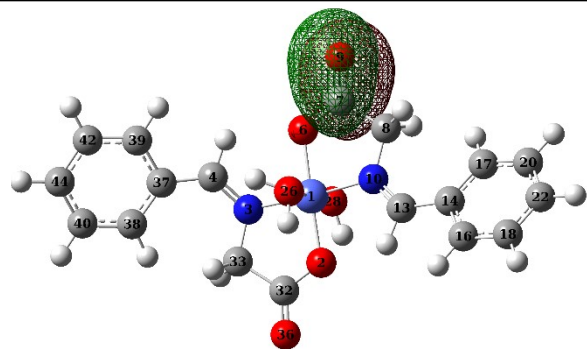

**BD(1)Co-N<sub>3</sub>**

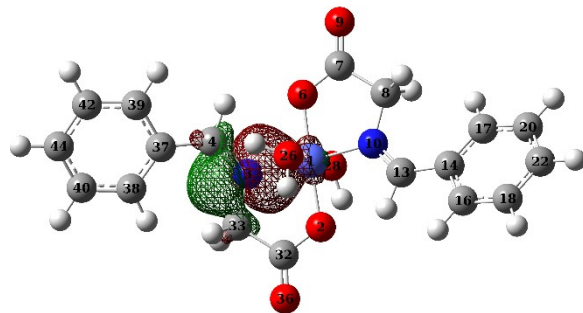

**LP(1)N<sub>10</sub>**

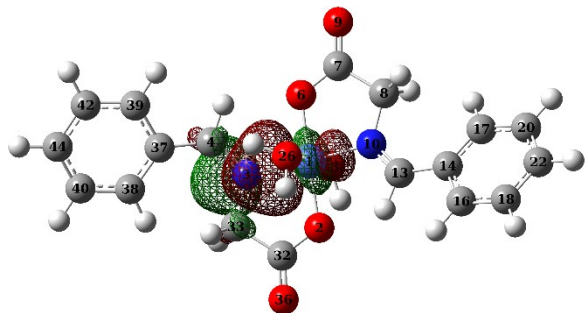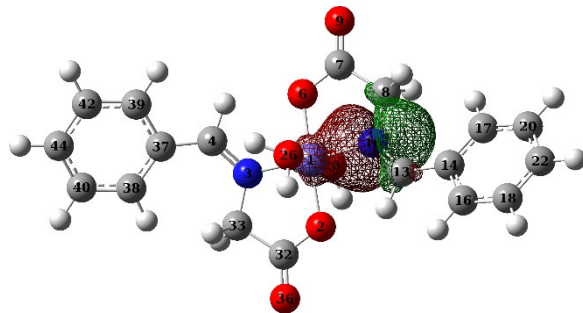



**Table S3** Calculated NBOs densities of Cr(III)-L at expected inhibitor-metal interactions.

|                                                                                                                                                           |                                                                                                                                                            |
|-----------------------------------------------------------------------------------------------------------------------------------------------------------|------------------------------------------------------------------------------------------------------------------------------------------------------------|
| <p style="text-align: center;">LP(1)C<sub>40</sub></p> 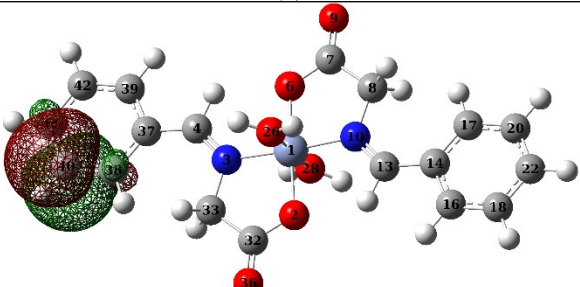                  | <p style="text-align: center;">LP(1)Cr</p>                               |
| <p style="text-align: center;">LP(2)O<sub>9</sub></p>                    | <p style="text-align: center;">LP(2)O<sub>36</sub></p>                   |
| <p style="text-align: center;">BD(2)C<sub>18</sub>-C<sub>22</sub></p>   | <p style="text-align: center;">BD(2)C<sub>40</sub>-C<sub>44</sub></p>   |
| <p style="text-align: center;">BD(2)C<sub>14</sub>-C<sub>16</sub></p>  | <p style="text-align: center;">BD(2)C<sub>17</sub>-C<sub>20</sub></p>  |
| <p style="text-align: center;">BD(2)C<sub>37</sub>-C<sub>38</sub></p>                                                                                     | <p style="text-align: center;">LP(1)Cr</p>                                                                                                                 |



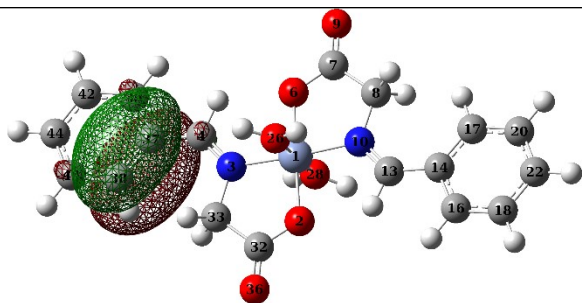

LP(2)O<sub>2</sub>

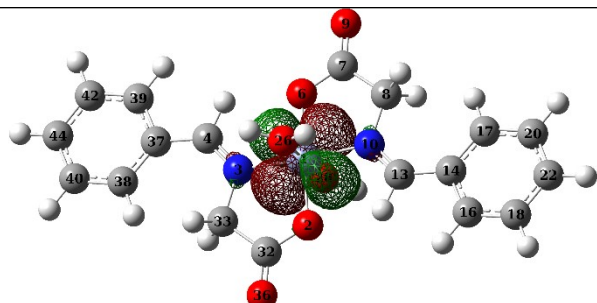

LP(2)O<sub>6</sub>

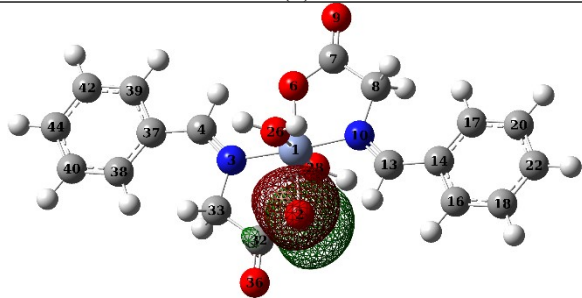

BD(2)C<sub>7</sub>-O<sub>9</sub>

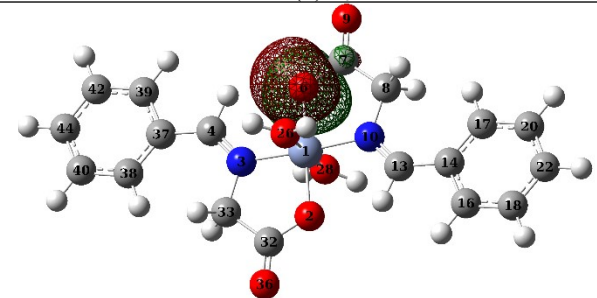

BD(2)C<sub>32</sub>-O<sub>36</sub>

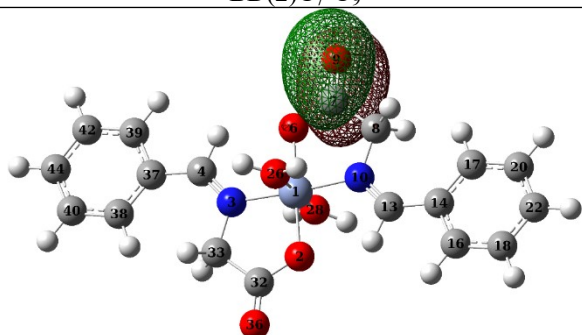

BD(2)N<sub>10</sub>-C<sub>13</sub>

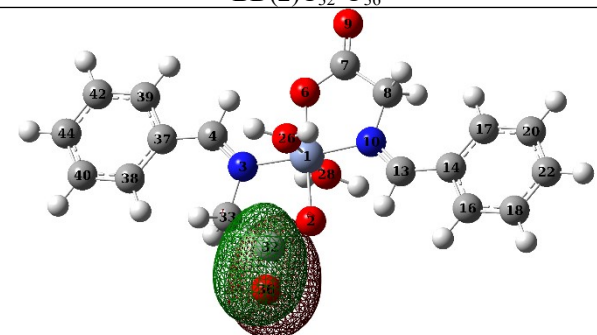

BD(2)N<sub>3</sub>-C<sub>4</sub>

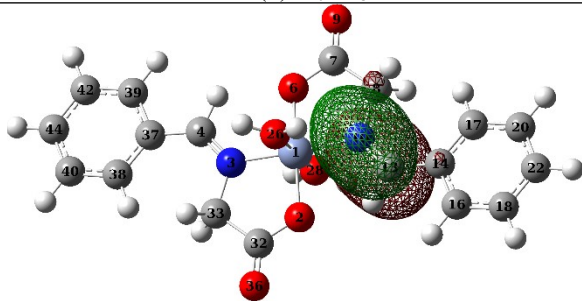

LP(1)O<sub>28</sub>

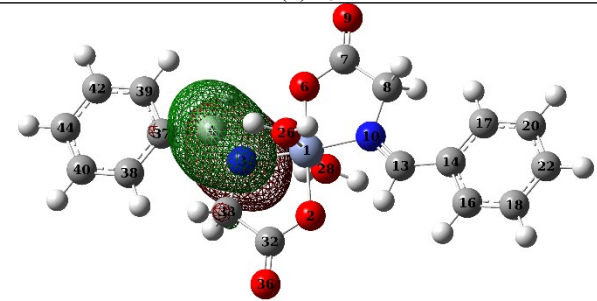

LP(1)O<sub>26</sub>

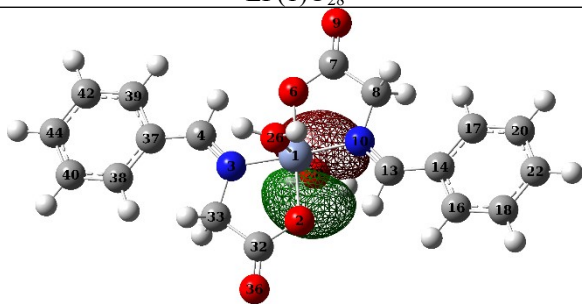

LP(1)N<sub>3</sub>

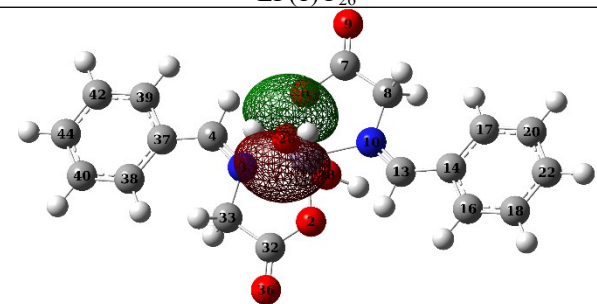

LP(1)N<sub>10</sub>

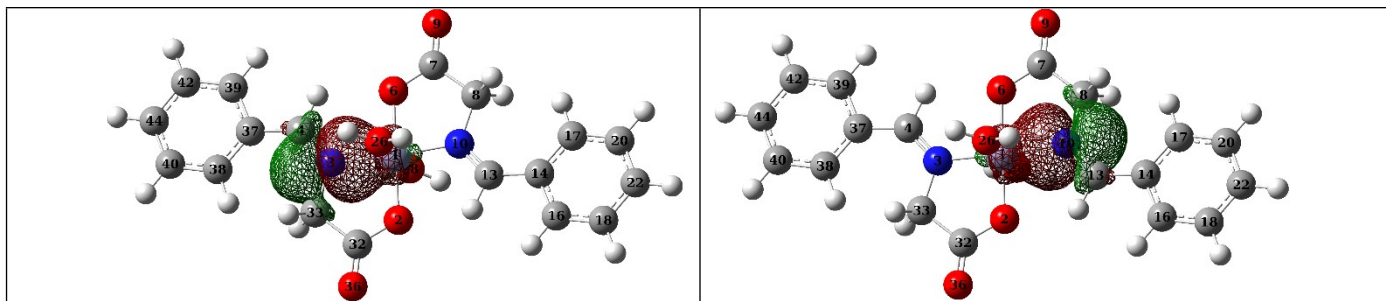

**Table S4** Condensed Fukui functions of ligand molecule.

| <b>Atoms</b>    | <b>Charges<sup>a</sup></b> | $f^+$ | $f^-$ | $\Delta f^b$ |
|-----------------|----------------------------|-------|-------|--------------|
| N <sub>8</sub>  | -0.189                     | 0.085 | 0.114 | 0.029        |
| C <sub>7</sub>  | 0.056                      | 0.042 | 0.109 | 0.067        |
| C <sub>1</sub>  | -0.039                     | 0.106 | 0.098 | -0.008       |
| C <sub>5</sub>  | -0.032                     | 0.058 | 0.061 | 0.003        |
| C <sub>2</sub>  | -0.047                     | 0.062 | 0.056 | -0.006       |
| C <sub>3</sub>  | -0.042                     | 0.051 | 0.054 | 0.003        |
| C <sub>4</sub>  | -0.008                     | 0.076 | 0.051 | -0.025       |
| O <sub>11</sub> | -0.298                     | 0.101 | 0.050 | -0.051       |
| C <sub>6</sub>  | -0.043                     | 0.047 | 0.049 | 0.002        |
| C <sub>9</sub>  | -0.001                     | 0.027 | 0.026 | -0.001       |
| C <sub>10</sub> | 0.232                      | 0.032 | 0.019 | -0.013       |
| O <sub>12</sub> | -0.191                     | 0.031 | 0.007 | -0.024       |

<sup>a</sup>Hirshfeld charges at B3LYP/6-31G(d,p).<sup>b</sup> $\Delta f = f^- - f^+$ .
